# Supplementary material for: Hammett Correlation in the Accelerated Formation of 2,3-Diphenylquinoxalines in Nebulizer Microdroplets
Source: MDPI journal article supplement (doi:10.3390/molecules26165077), 2021-08-21
Supplement: s1 [file s1]

## Supplementary Materials

Peaks labelled in chromatograms are for the quinoxaline products of the reaction, with peak areas given in the subsequent table. Other peaks of significant intensity are from unreacted starting materials. Abbreviations used are explained in the main text.

Figure S1: Chromatogram for competition of P, B and FP

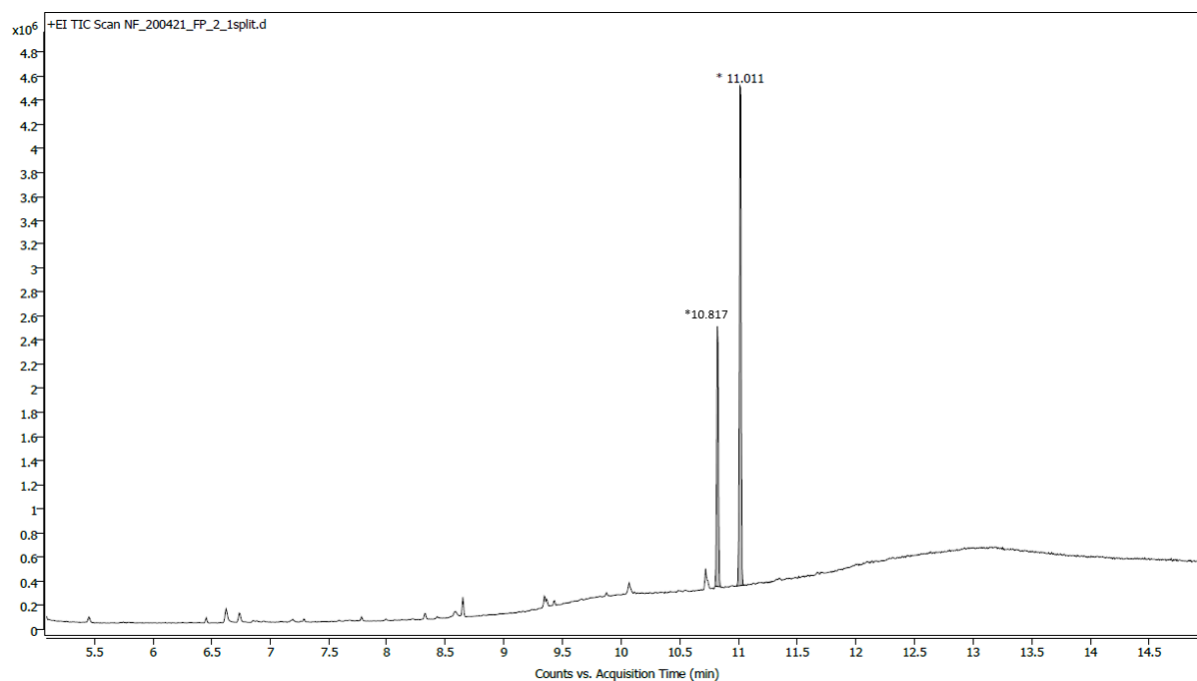

Table S1: Peak information for competition of P, B and FP

| Retention Time (minutes) | Compound | Peak Area |
|--------------------------|----------|-----------|
| 10.817                   | FQ       | 2278456   |
| 11.011                   | Q        | 4449338   |

Figure S2: Chromatogram for competition of P, B and F<sub>2</sub>P

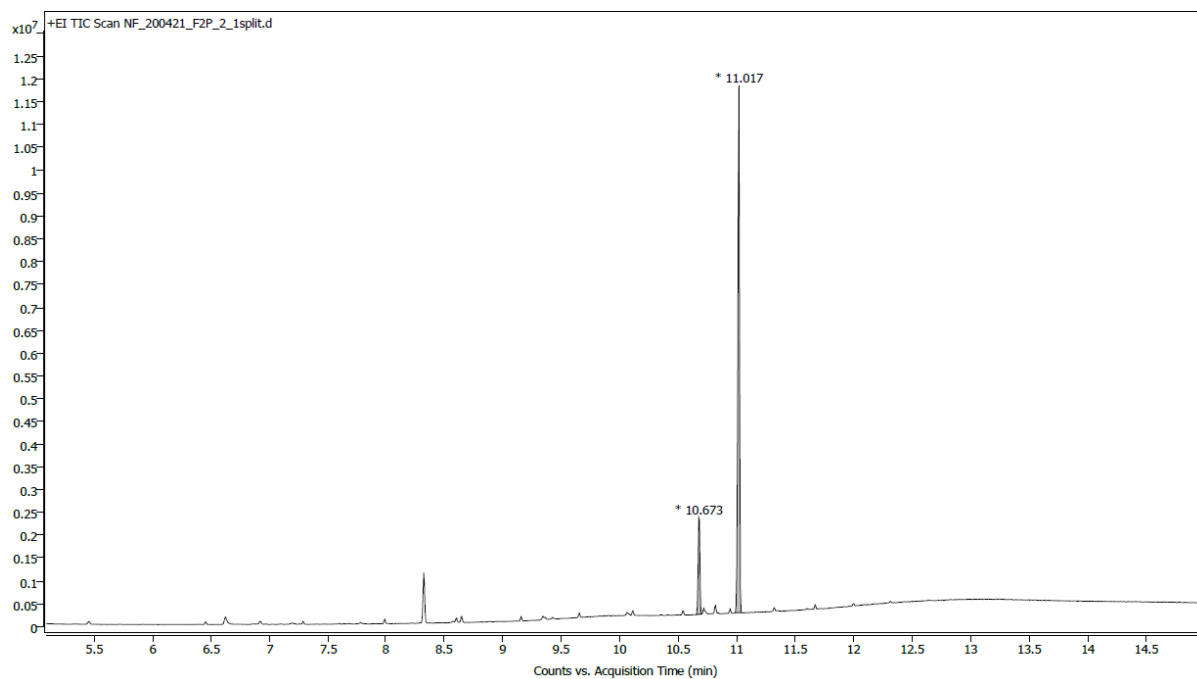

Table S2: Peak information for competition of P, B and F<sub>2</sub>P

| Retention Time (minutes) | Compound         | Peak Area |
|--------------------------|------------------|-----------|
| 10.673                   | F <sub>2</sub> Q | 2249887   |
| 11.017                   | Q                | 11483882  |

Figure S3: Chromatogram for competition of P, B and CIP

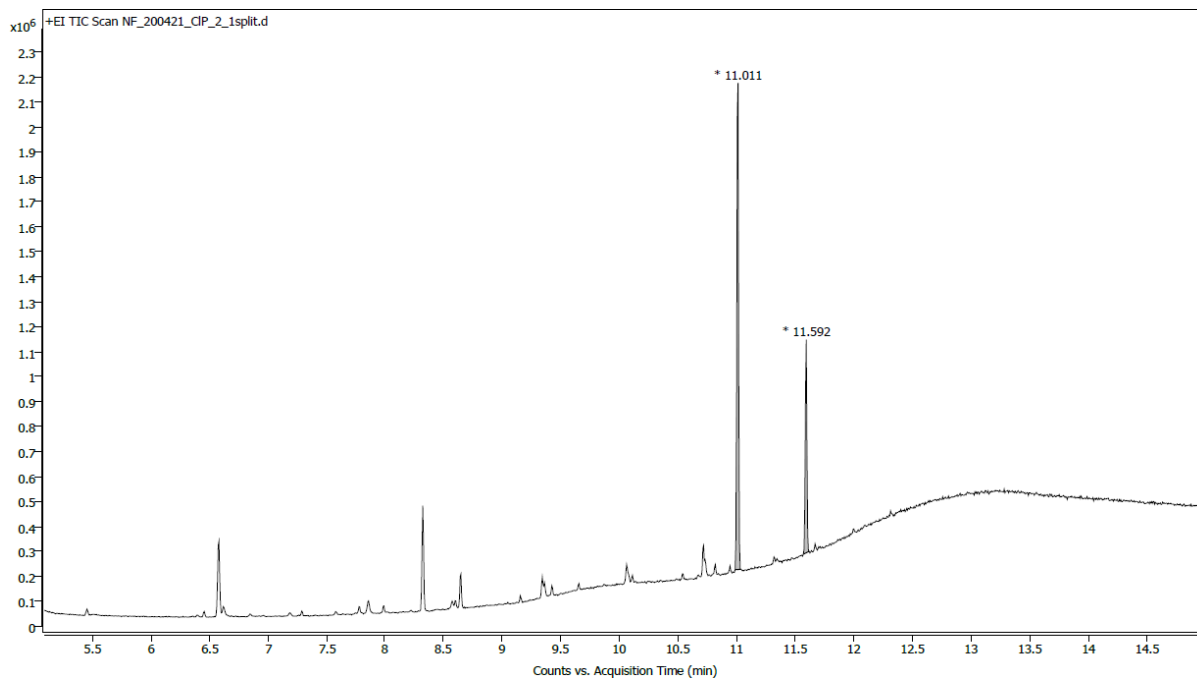

Table S3: Peak information for competition of P, B and CIP

| Retention Time (minutes) | Compound | Peak Area |
|--------------------------|----------|-----------|
| 11.011                   | Q        | 2071985   |
| 11.592                   | ClQ      | 837054    |

Figure S4: Chromatogram for competition of P, B and Cl<sub>2</sub>P

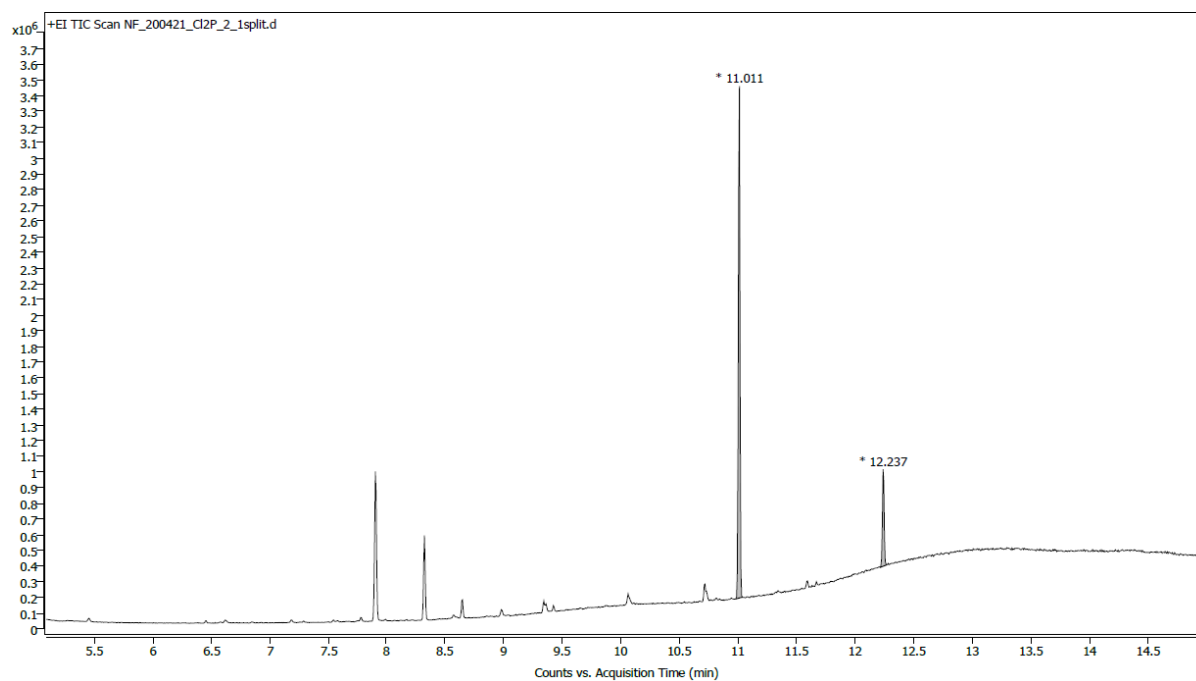

Table S4: Peak information for competition of P, B and Cl<sub>2</sub>P

| Retention Time (minutes) | Compound          | Peak Area |
|--------------------------|-------------------|-----------|
| 11.011                   | Q                 | 3199273   |
| 12.237                   | Cl <sub>2</sub> Q | 734213    |

Figure S5: Chromatogram for competition of P, B and BrP

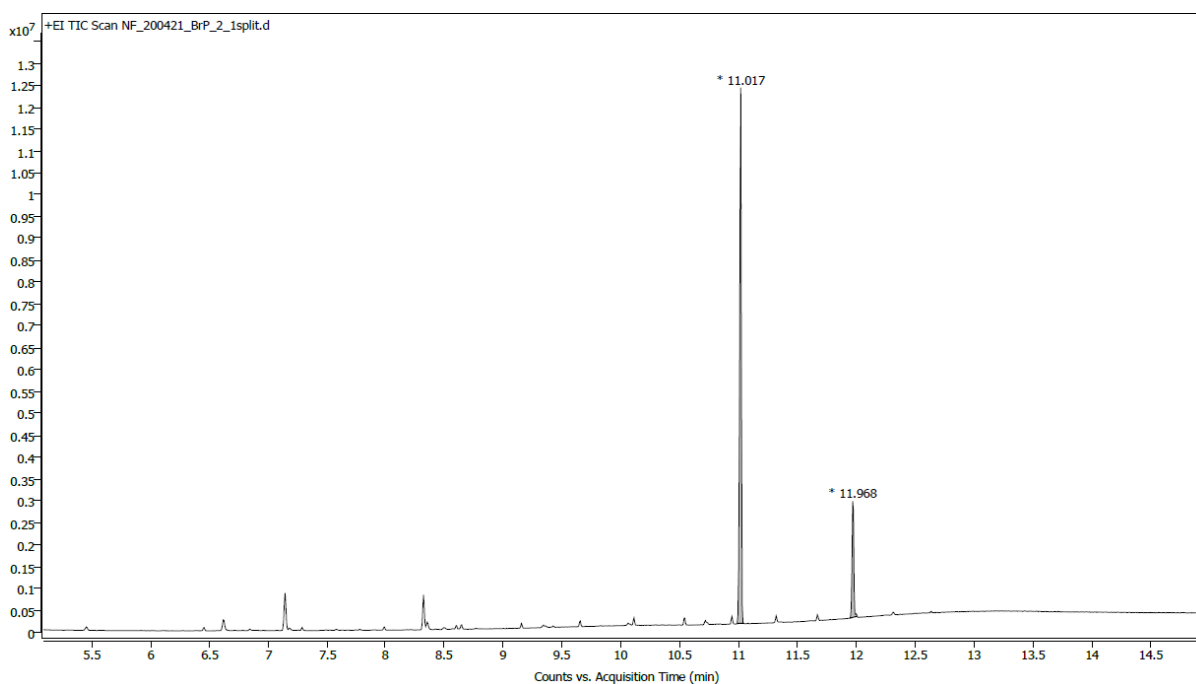

Table S5: Peak information for competition of P, B and BrP

| Retention Time (minutes) | Compound | Peak Area |
|--------------------------|----------|-----------|
| 11.017                   | Q        | 12157642  |
| 11.968                   | BrQ      | 2835429   |

Figure S6: Chromatogram for competition of P, B and Br<sub>2</sub>P

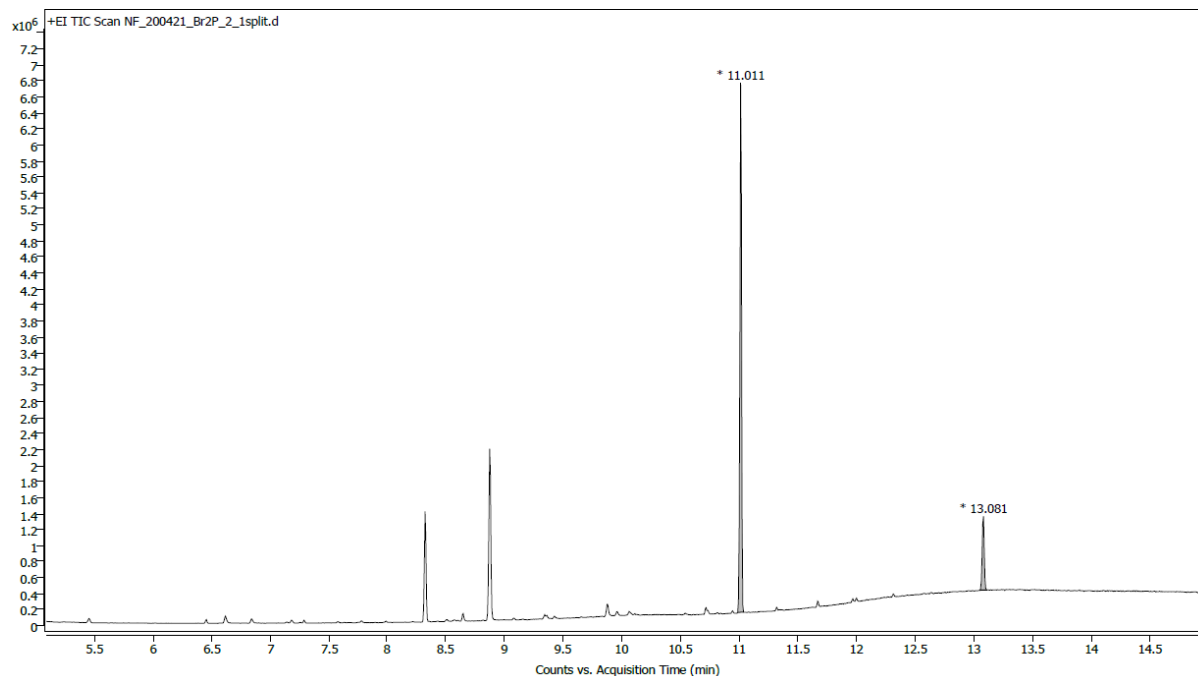

Table S6: Peak information for competition of P, B and Br<sub>2</sub>P

| Retention Time (minutes) | Compound          | Peak Area |
|--------------------------|-------------------|-----------|
| 11.011                   | Q                 | 6719543   |
| 13.081                   | Br <sub>2</sub> Q | 1531152   |

Figure S7: Chromatogram for competition of P, B and CH<sub>3</sub>P

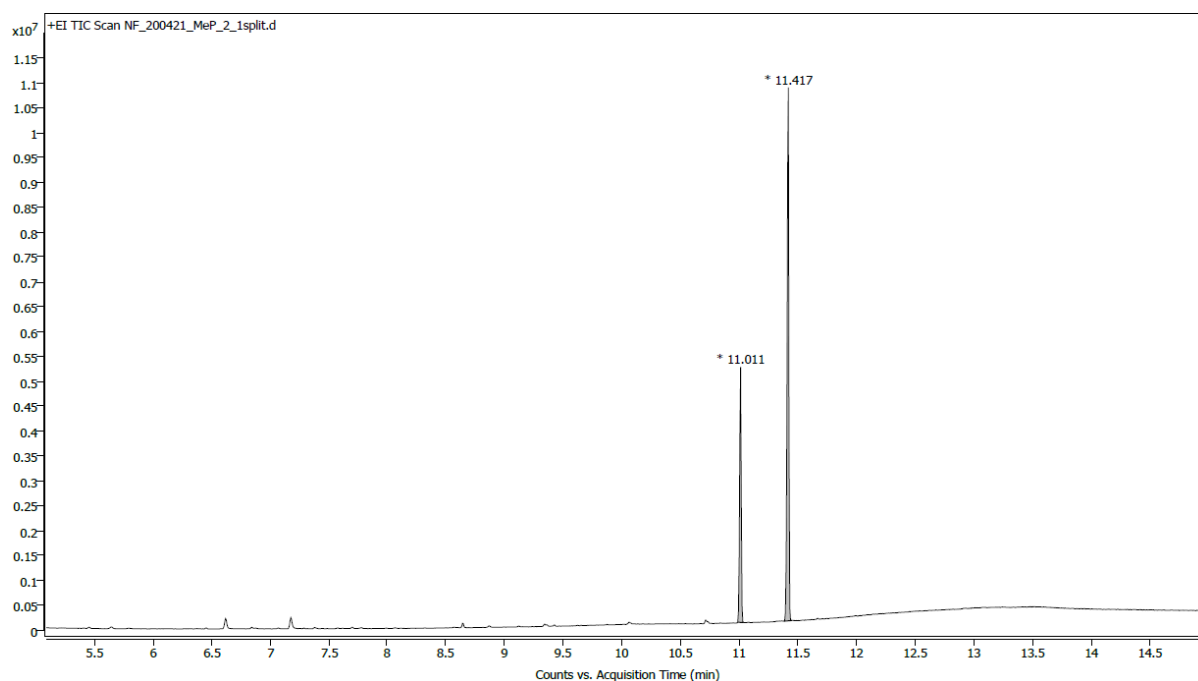

Table S7: Peak information for competition of P, B and CH<sub>3</sub>P

| Retention Time (minutes) | Compound          | Peak Area |
|--------------------------|-------------------|-----------|
| 11.011                   | Q                 | 4952474   |
| 11.417                   | CH <sub>3</sub> Q | 10712490  |

Figure S8: Chromatogram for competition of P, B and (CH<sub>3</sub>)<sub>2</sub>P

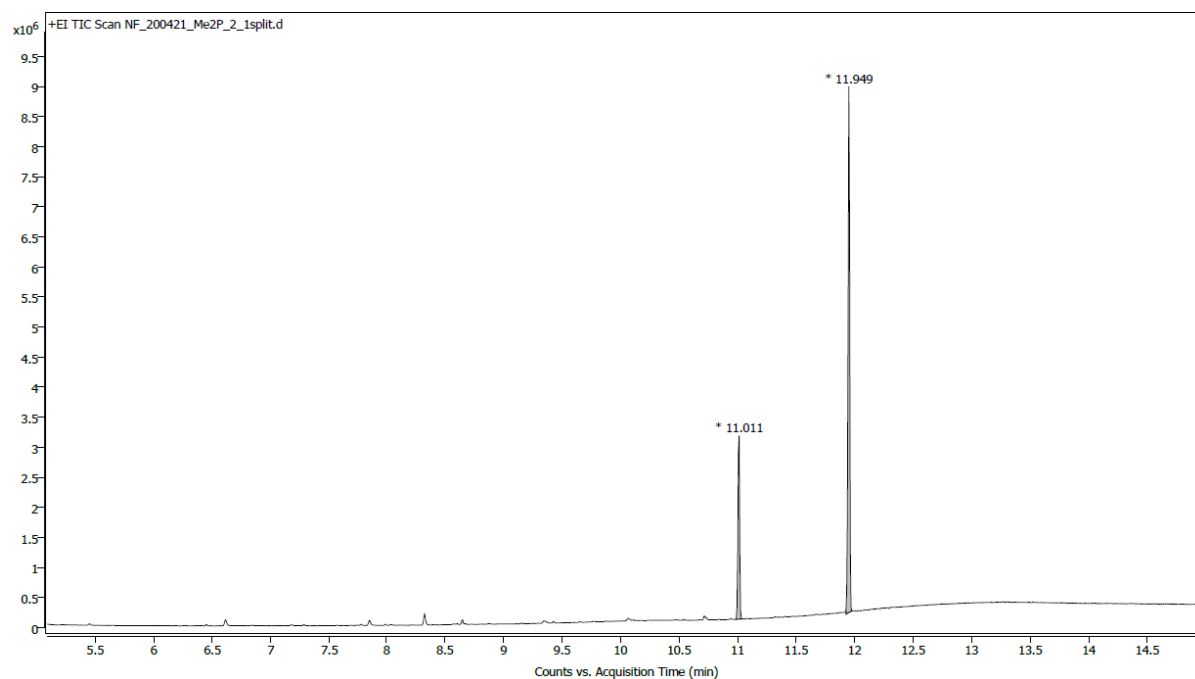

Table S8: Peak information for competition of P, B and (CH<sub>3</sub>)<sub>2</sub>P

| Retention Time (minutes) | Compound                          | Peak Area |
|--------------------------|-----------------------------------|-----------|
| 11.011                   | Q                                 | 3130334   |
| 11.949                   | (CH <sub>3</sub> ) <sub>2</sub> Q | 8726454   |

Figure S9: Chromatogram for competition of P, B and CH<sub>3</sub>OP

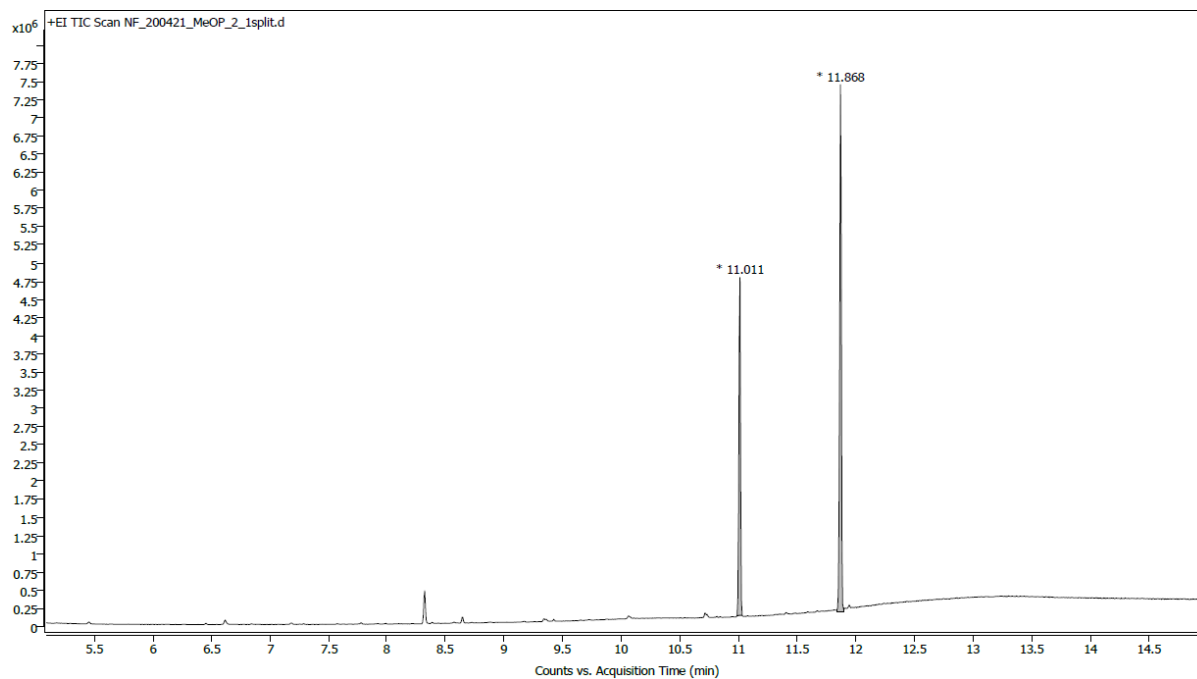

Figure S9: Chromatogram for competition of P, B and CH<sub>3</sub>OP

| Retention Time (minutes) | Compound           | Peak Area |
|--------------------------|--------------------|-----------|
| 11.011                   | Q                  | 4565609   |
| 11.868                   | CH <sub>3</sub> OQ | 7223694   |

Figure S10: Chromatogram for competition of P, B and CF<sub>3</sub>P

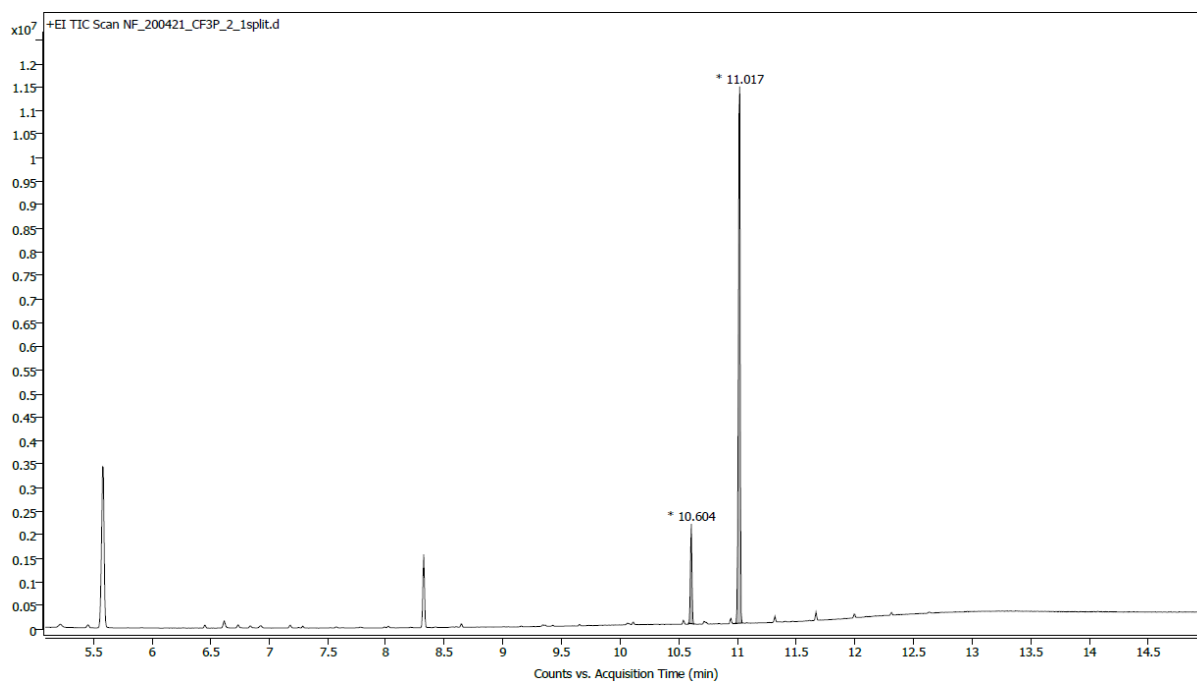

Table S10: Peak information for competition of P, B and CF<sub>3</sub>P

| Retention Time (minutes) | Compound          | Peak Area |
|--------------------------|-------------------|-----------|
| 10.604                   | CF <sub>3</sub> Q | 1926036   |
| 11.017                   | Q                 | 12138765  |

Figure S11: Chromatogram for competition of P, B and CH<sub>3</sub>OOCQ

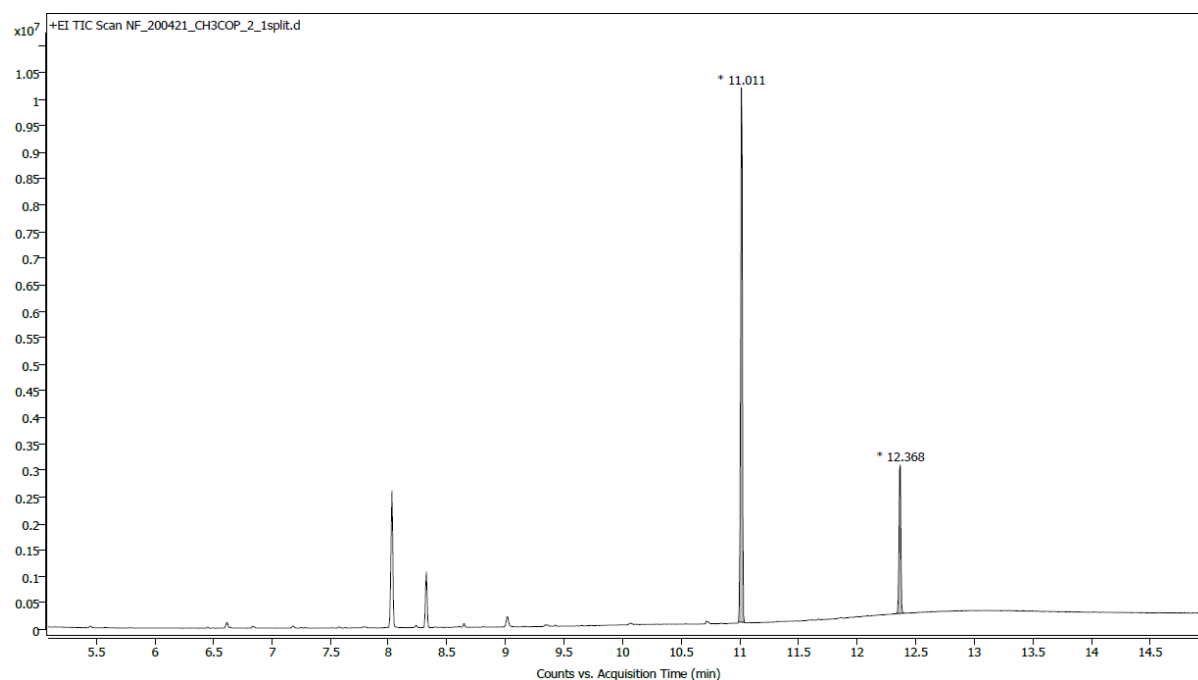

Table S11: Peak information for competition of P, B and CH<sub>3</sub>OOCQ

| Retention Time (minutes) | Compound             | Peak Area |
|--------------------------|----------------------|-----------|
| 11.011                   | Q                    | 10763380  |
| 12.368                   | CH <sub>3</sub> OOCQ | 3070028   |

Figure S12: Chromatogram for competition of P, B and NCP

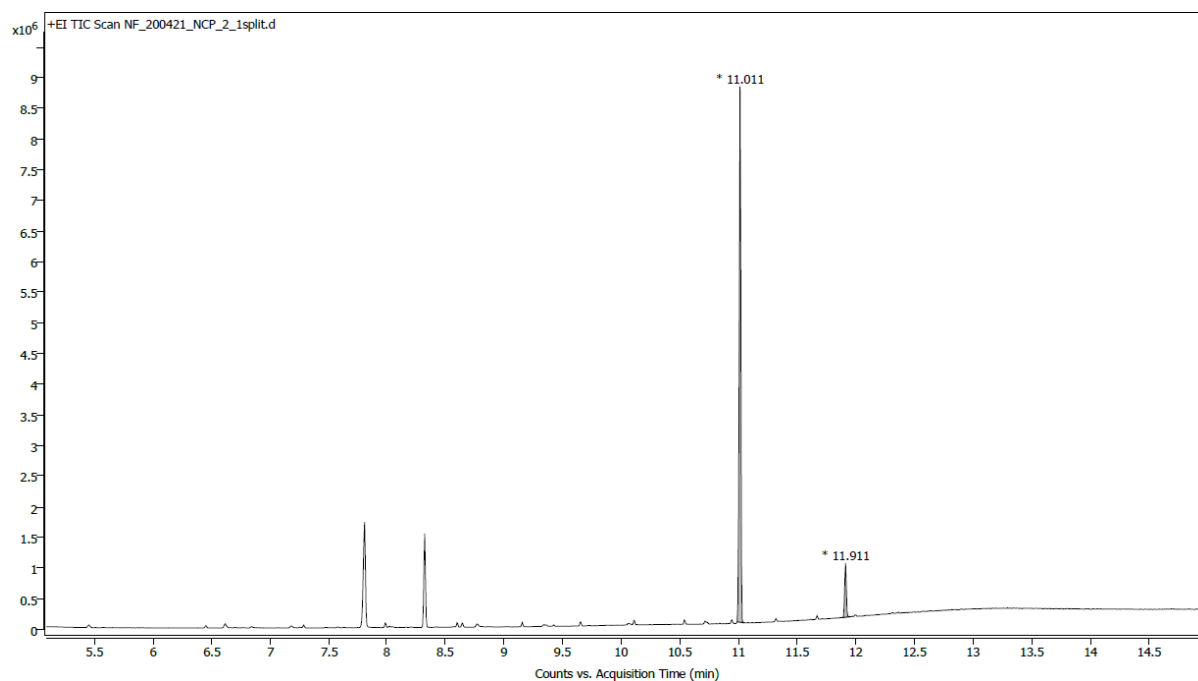

Table S12: Peak information for competition of P, B and NCP

| Retention Time (minutes) | Compound | Peak Area |
|--------------------------|----------|-----------|
| 11.011                   | Q        | 8425667   |
| 11.911                   | NCQ      | 858243    |

Figure S13: Chromatogram for competition of P, B and NO<sub>2</sub>P

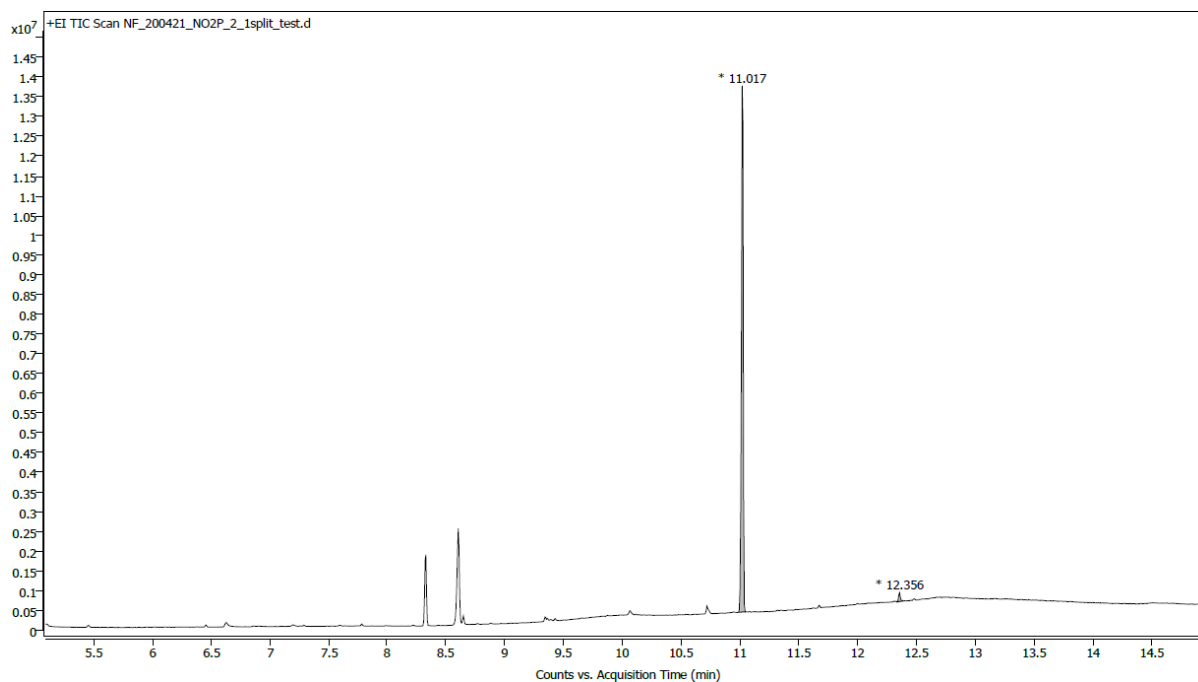

Table S13: Peak information for competition of P, B and NO<sub>2</sub>P

| Retention Time (minutes) | Compound          | Peak Area |
|--------------------------|-------------------|-----------|
| 11.017                   | Q                 | 14687656  |
| 12.356                   | NO <sub>2</sub> Q | 350914    |
